# Supplementary material for: Assessment of upper tropospheric and stratospheric water vapor and ozone in reanalyses as part of S-RIP
Source: Copernicus journal article supplement (doi:10.5194/acp-17-12743-2017), 2017-10-26
Supplement: Supplementary file 1 [file acp-17-12743-2017-supplement.pdf]

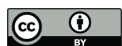

*Supplement of*

## **Assessment of upper tropospheric and stratospheric water vapor and ozone in reanalyses as part of S-RIP**

**S. M. Davis et al.**

*Correspondence to:* Sean M. Davis ([sean.m.davis@noaa.gov](mailto:sean.m.davis@noaa.gov))

The copyright of individual parts of the supplement might differ from the CC BY 3.0 License.

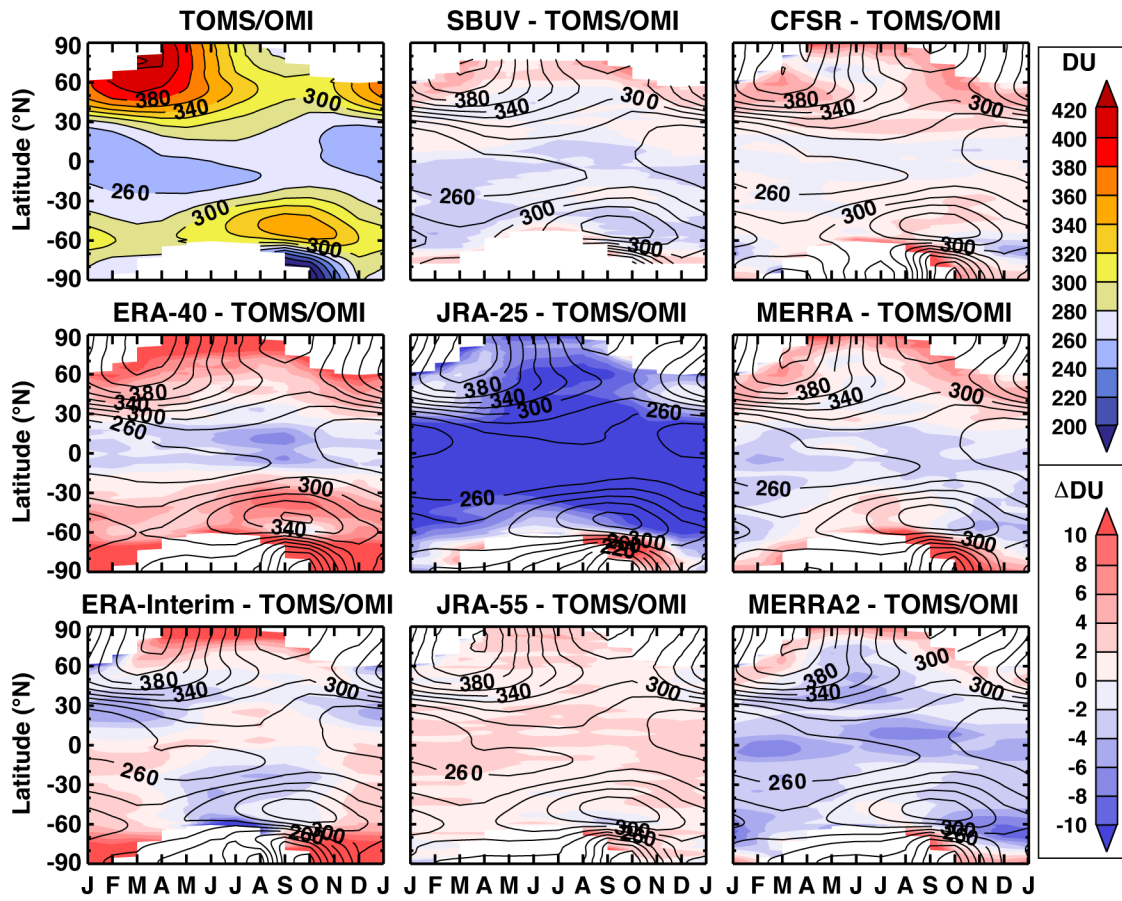

Figure S1: Same as Fig. 3, except using TOMS/OMI as the observational data set.

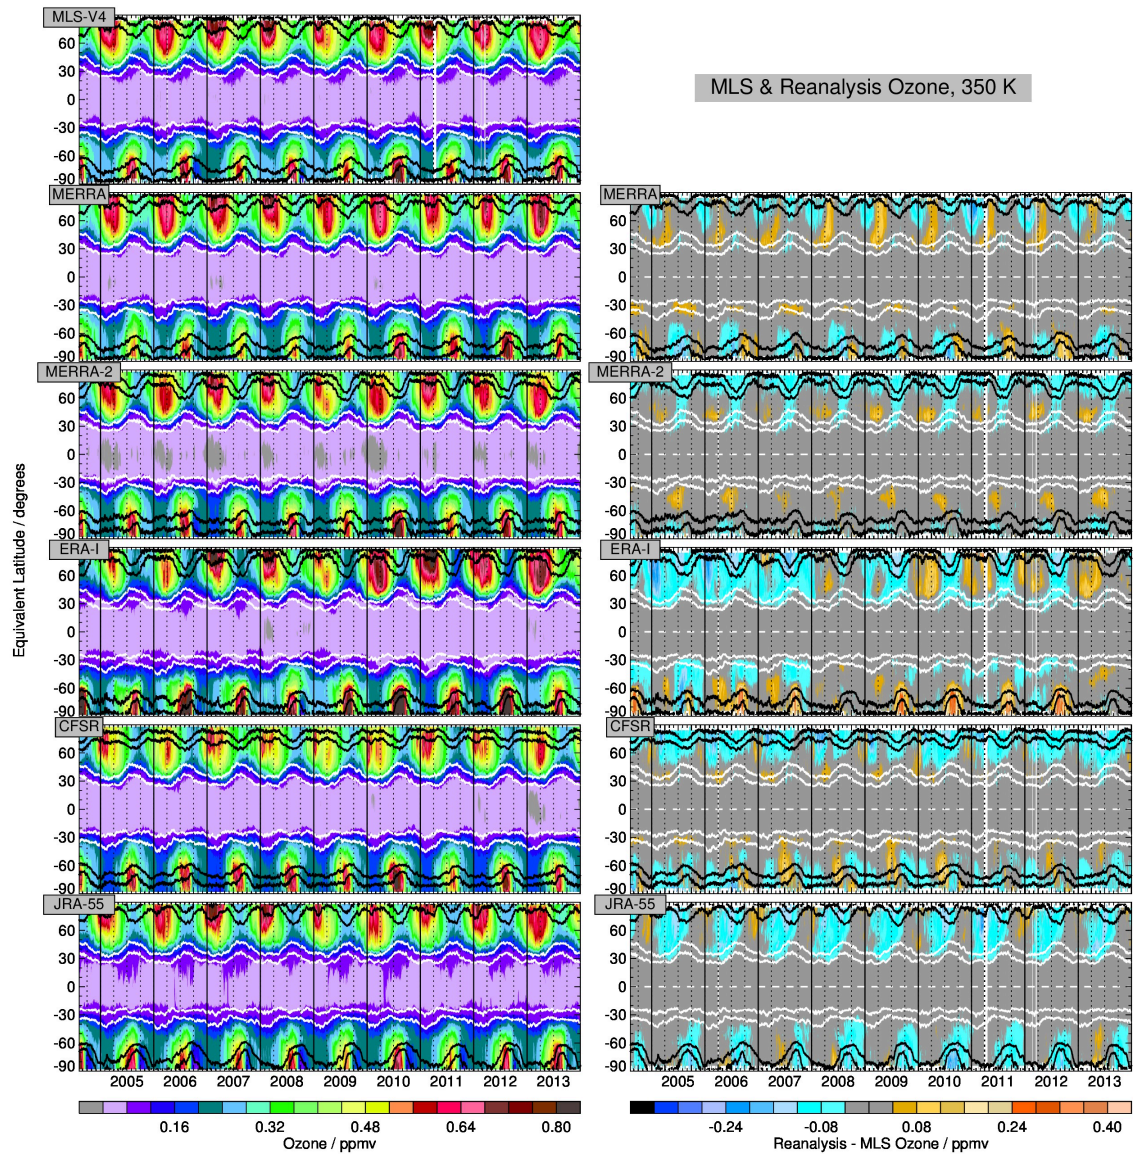

Figure S2: Same as Fig. 7, but at 350 K.

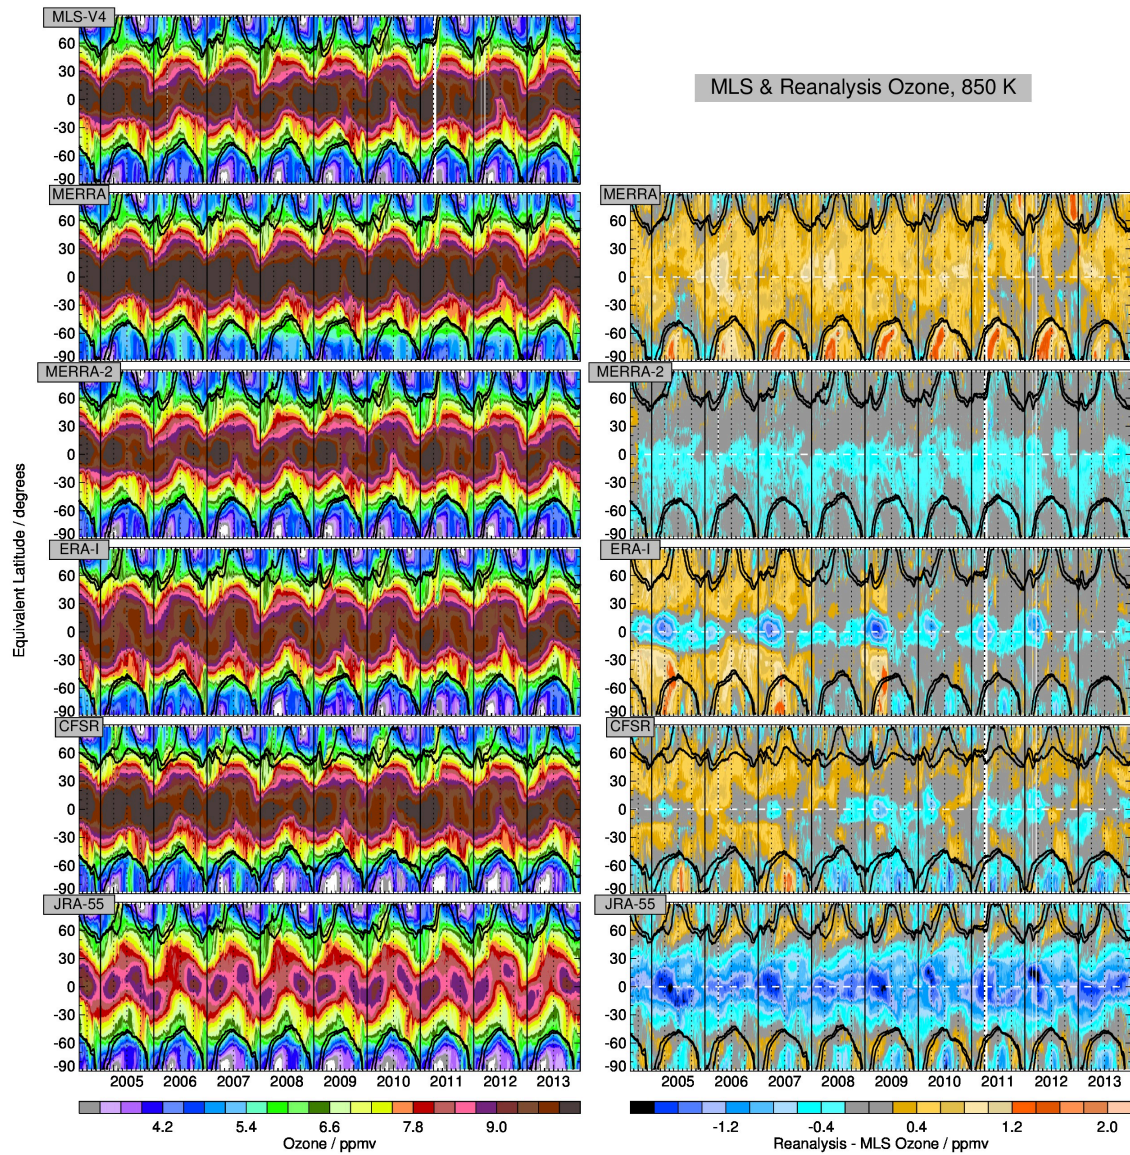

Figure S3: Same as Fig. 7, but at 850 K.

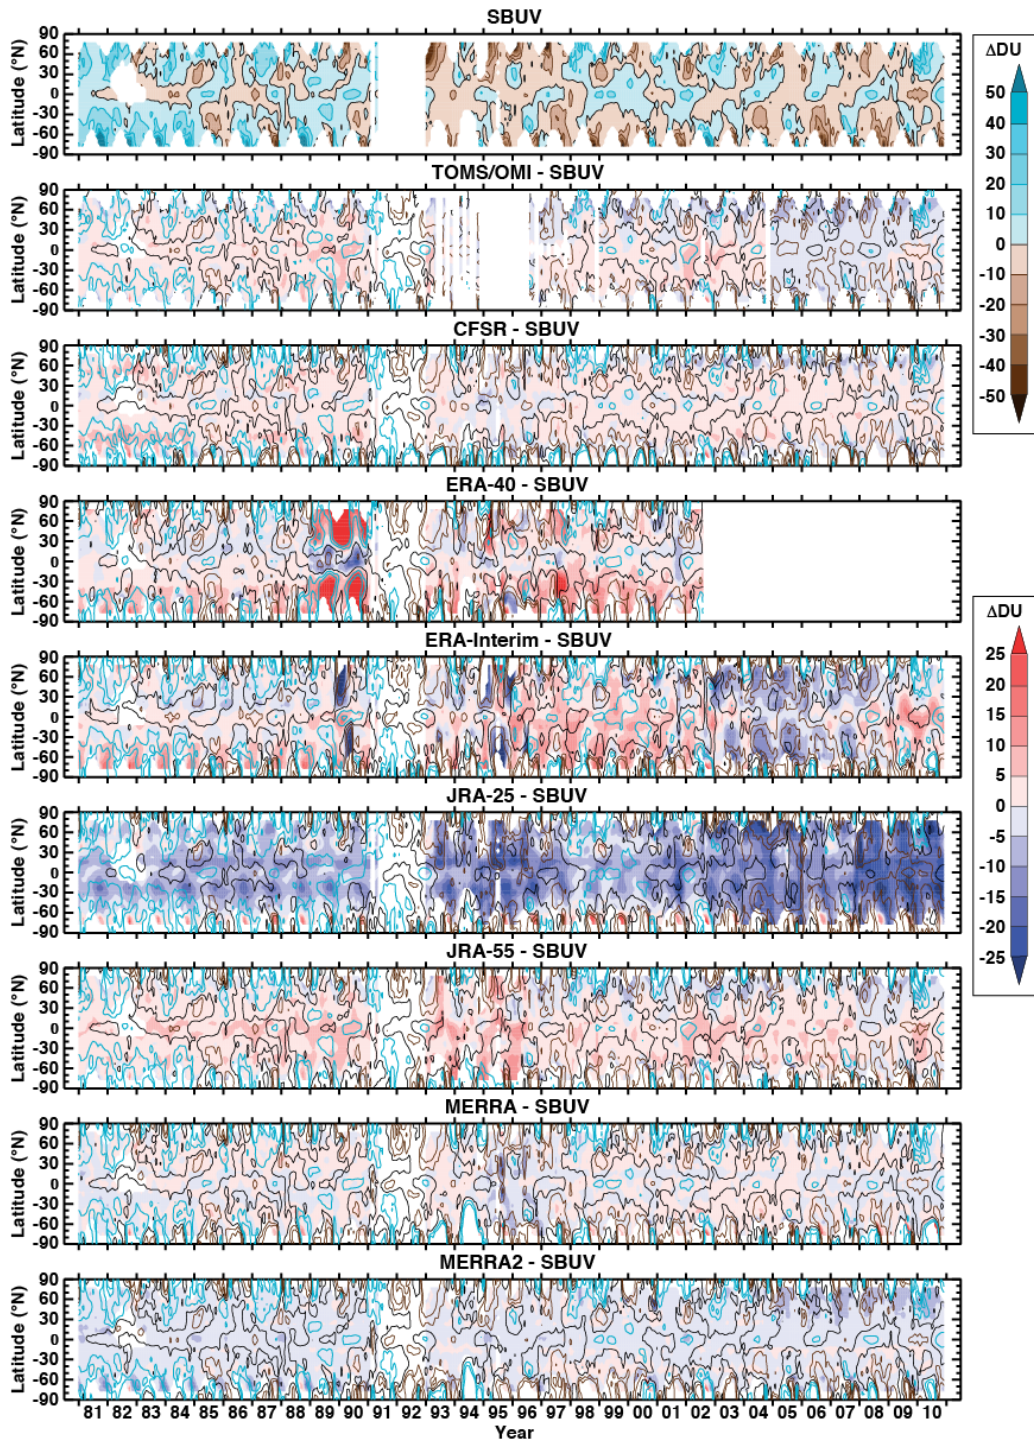

Figure S4: TCO latitude vs. time anomalies for SBUV (top row), differences between TOMS/OMI and SBUV (second from top), and differences between SBUV and the reanalyses (other rows).

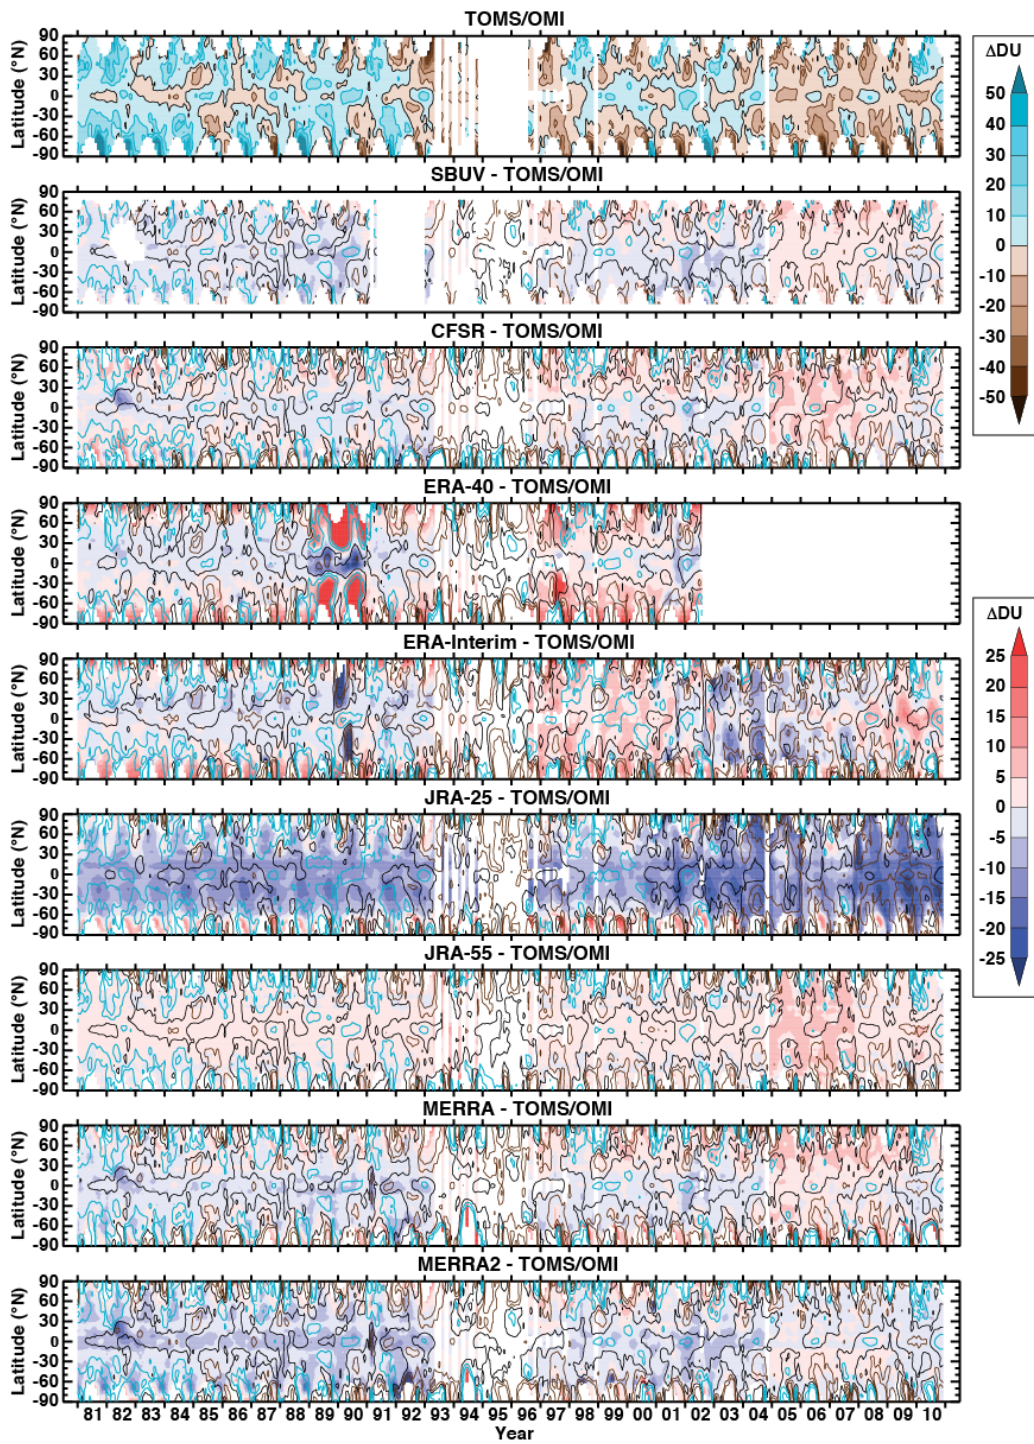

Figure S5: TCO latitude vs. time anomalies for TOMS/OMI (top row), differences between SBUV and TOMS/OMI (second from top), and differences between TOMS/OMI and the reanalyses (other rows).
